# Supplementary material
Source: Springer Nature journal article supplement (https://www.springermedizin.de/resource/supplementary/13223_2014_520_MOESM1_ESM.pdf/9596708)
Supplement: MOESM1 [file 9596708]

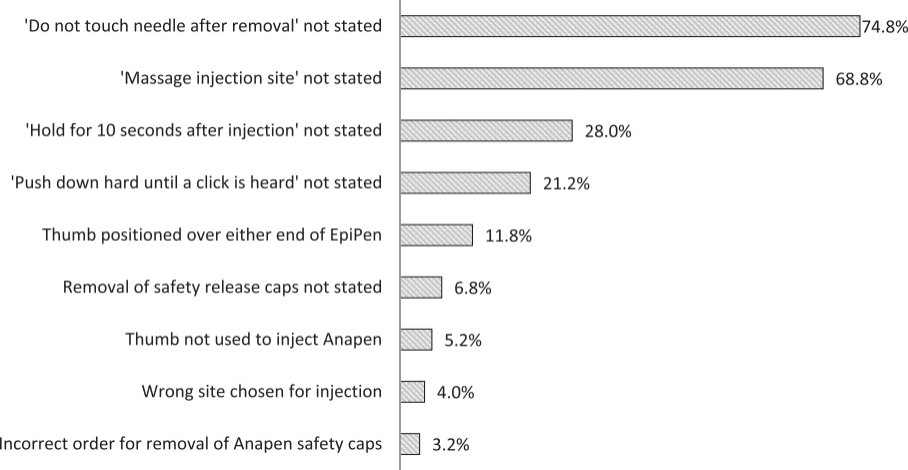

'Do not touch needle after removal' not stated

74.8%

'Massage injection site' not stated

68.8%

'Hold for 10 seconds after injection' not stated

28.0%

'Push down hard until a click is heard' not stated

21.2%

Thumb positioned over either end of EpiPen

11.8%

Removal of safety release caps not stated

6.8%

Thumb not used to inject Anapen

5.2%

Wrong site chosen for injection

4.0%

Incorrect order for removal of Anapen safety caps

3.2%
